# Supplementary material for: 2La Paracentric Chromosomal Inversion and Overexpressed Metabolic Genes Enhance Thermotolerance and Pyrethroid Resistance in the Major Malaria Vector Anopheles gambiae
Source: Preprints.org preprint supplement (doi:10.20944/preprints202103.0693.v1), 2021-03-29
Supplement: Supplementary file 1 [file supplementary]

## Sheet: Auyo
Hadiyau, Auyo		AUYO
		larval bioassay
		insecticides
		permethrin
		Temperature 44⁰C Survivors
INSECTICIDE CONC (mg/ml)	1st REPLICATE		2nd REPLICATE		3rd REPLICATE		4th REPLICATE		AVERAGE %MORTALITY
	DEAD 24HRS	ALIVE 24HRS	DEAD 24HRS	ALIVE 24HRS	DEAD 24HRS	ALIVE 24HRS	DEAD 24HRS	ALIVE 24HRS		SD
100	11	9	8	12	13	7	4	16	45	3.91578
50	7	13	0	20	11	9	5	18	28.75	4.57347
25	4	16	3	17	2	18	11	20	25	4.08248
12.5	1	19	0	20	4	16	0	20	6.25	1.89297
CONTROL H2O	1	19	1	19	0	20	0	20	2.5	0.57735
CONTROL ETHANOL	3	17	0	20	0	20	2	20	6.25	1.5
				LARVAL BIOASSAY
		CONTROL UNEXPOSED TO TT
INSECTICIDE CONC (mg/ml)	1st REPLICATE		2nd REPLICATE		3rd REPLICATE		4th REPLICATE		AVERAGE %MORTALITY
	DEAD 24HRS	ALIVE 24HRS	DEAD 24HRS	ALIVE 24HRS	DEAD 24HRS	ALIVE 24HRS	DEAD 24HRS	ALIVE 24HRS		SD
100	10	10	7	13	13	7	10	10	50	2.44949
50	0	20	4	16	8	12	12	8	30	5.16398
25	0	20	3	17	5	15	11	10	23.75	4.64579
12.5	0	20	3	17	3	17	5	15	13.75	2.06155
CONTROL H2O	0	20	1	19	0	20	0	20	1.25	0.5
CONTROL ETHANOL	0	20	0	20	2	18	0	20	2.5	1
		PERMETHRIN 0.75% S		Temperature 44⁰C Survivors
INSECTICIDES	No. of Mosquitoes	DEAD 0MIN.	KD 15MIN.	KD 30MIN.	KD 45MIN.	KD60MIN	DEAD 24HRS	ALIVE 24HRS	Mortality
PERMETHRIN-1	25	0	0	0	0	1	1	24	4
PERMETHRIN-2	25	0	0	1	1	1	1	24	4
PERMETHRIN-3	25	0	0	0	0	0	0	25	0
PERMETHRIN-4	25	0	0	0	1	1	1	24	4
CONTROL	25	0	0	0	0	0	0	25	0
								% mortality	3
								std	2
BUK Kano Metropolis	PERMETHRIN 0.75%			CONTROL UNEXPOSED TO TT
INSECTICIDES	No. of Mosquitoes	DEAD 0MIN.	KD 15MIN.	KD 30MIN.	KD 45MIN.	KD60MIN	DEAD 24HRS	ALIVE 24HRS	Mortality
PERMETHRIN-1	25	0	0	0	3	3	3	22	12
PERMETHRIN-2	25	0	0	0	0	0	1	24	4
PERMETHRIN-3	25	0	1	1	2	2	4	21	16
PERMETHRIN-4	25	0	0	0	1	2	4	21	16
CONTROL	25	0	0	0	0	0	0	25	0
								% mortality	12
								std	5.65685

## Sheet: BUK Kano Metropolis
BUK, Kano Metropolis		larval bioassay
		insecticides
		permethrin
		Temperature 44⁰C Survivors
INSECTICIDE CONC (mg/ml)	1st REPLICATE		2nd REPLICATE		3rd REPLICATE		4th REPLICATE		AVERAGE %MORTALITY
	DEAD 24HRS	ALIVE 24HRS	DEAD 24HRS	ALIVE 24HRS	DEAD 24HRS	ALIVE 24HRS	DEAD 24HRS	ALIVE 24HRS		SD
100	9	11	10	10	6	14	16	4	51.25	4.19325
50	5	15	1	19	7	13	2	18	18.75	2.75379
25	0	20	3	17	1	19	0	20	5	1.41421
12.5	0	20	3	17	0	20	0	20	3.75	1.5
CONTROL H2O	0	20	0	20	2	18			3.33333
CONTROL ETHANOL	0	20	1	19	0	20			1.66667
		Permethrin		LARVAL BIOASSAY
		CONTROL
INSECTICIDE CONC (mg/ml)	1st REPLICATE		2nd REPLICATE		3rd REPLICATE		4th REPLICATE		AVERAGE %MORTALITY
	DEAD 24HRS	ALIVE 24HRS	DEAD 24HRS	ALIVE 24HRS	DEAD 24HRS	ALIVE 24HRS	DEAD 24HRS	ALIVE 24HRS		SD
100	11	9	11	9	13	7	7	13	52.5	2.51661
50	8	12	5	15	9	11	4	16	32.5	2.38048
25	2	18	5	15	6	14	1	19	17.5	2.38048
12.5	2	18	1	19	1	19	3	17	8.75	0.957427
CONTROL H2O	0	20	0	20	1	19			1.66667
CONTROL ETHANOL	0	20	0	20	2	18			3.33333
			adult bioassay
		PERMETHRIN 0.75%		Temperature 44⁰C Survivors
INSECTICIDES	No. of Mosquitoes	DEAD 0MIN.	KD 15MIN.	KD 30MIN.	KD 45MIN.	KD60MIN	DEAD 24HRS	ALIVE 24HRS	Average % Morality
PERMETHRIN-1	22	0	0	0	0	1	1	21	4.54545
PERMETHRIN-2	24	0	0	0	0	0	2	22	8.33333
PERMETHRIN-3	25	0	0	0	0	0	3	22	12
PERMETHRIN-4	25	1	1	1	2	3	4	21	16
CONTROL	20	0	0	0	0	0	0	20	0
								% mortality	10.2197
								std	4.91042
BUK Kano Metropolis	PERMETHRIN 0.75%			CONTROL
INSECTICIDES	No. of Mosquitoes	DEAD 0MIN.	KD 15MIN.	KD 30MIN.	KD 45MIN.	KD60MIN	DEAD 24HRS	ALIVE 24HRS	Average % Morality
PERMETHRIN-1	25	0	0	1	0	7	6	19	24
PERMETHRIN-2	25	0	0	1	2	2	4	21	16
PERMETHRIN-3	25	0	0	1	3	4	6	19	24
PERMETHRIN-4	25	0	0	2	1	5	4	21	16
CONTROL	25	0	0	0	0	0	1	24	4
								% mortality	20
								std	4.6188

## Sheet: GamjinBappa Karaye
			larval bioassay
Gamjin Bappa, Karaye			insecticides
			permethrin
			Temperature 44⁰C Survivors
	INSECTICIDE CONC (mg/ml)	1st REPLICATE		2nd REPLICATE		3rd REPLICATE		4th REPLICATE		AVERAGE %MORTALITY
		DEAD 24HRS	ALIVE 24HRS	DEAD 24HRS	ALIVE 24HRS	DEAD 24HRS	ALIVE 24HRS	DEAD 24HRS	ALIVE 24HRS		SD
	100	4	16	6	14	8	12	2	18	25	2.58199
	50	1	19	5	15	2	18	9	11	21.25	3.59398
	25	2	18	0	20	4	16	0	20	7.5	1.91485
	12.5	2	18	0	20	1	19			3.75	1
	CONTROL H2O	0	19	0	20	1	19			1.66667
	CONTROL ETHANOL	1	20	0	20	1	19			3.33333
				CONTROL
	INSECTICIDE CONC (mg/ml)	1st REPLICATE		2nd REPLICATE		3rd REPLICATE		4th REPLICATE		AVERAGE %MORTALITY
		DEAD 24HRS	ALIVE 24HRS	DEAD 24HRS	ALIVE 24HRS	DEAD 24HRS	ALIVE 24HRS	DEAD 24HRS	ALIVE 24HRS		SD
	100	4	18	6	14	7	13	7	13	30	1.41421
	50	5	15	4	16	9	11	4	16	27.5	2.38048
	25	0	20	0	20	4	16	1	19	6.25	1.89297
	12.5	2	18	0	20	3	17	0	20	6.25	1.5
	CONTROL H2O	0	20	1	19	1	18	0	20	2.5
	CONTROL ETHANOL	1	20	0	20	2	18			5
			Adult Bioassay
		PERMETHRIN 0.75%		Temperature 44⁰C Survivors
INSECTICIDES	No. of Mosquitoes	DEAD 0MIN.	KD 15MIN.	KD 30MIN.	KD 45MIN.	KD60MIN	DEAD 24HRS	ALIVE 24HRS	Average % Morality
PERMETHRIN-1	25	0	0	0	0	1	2	23	8
PERMETHRIN-2	25	0	0	0	0	0	1	24	4
PERMETHRIN-3	25	0	2	1	3	2	2	23	8
PERMETHRIN-4	25	0	0	0	0	0	2	23	8
CONTROL	20	0	0	0	0	0	0	20	0
								% mortality	7
								Std	2
		PERMETHRIN 0.75%		CONTROL
INSECTICIDES	No. of Mosquitoes	DEAD 0MIN.	KD 15MIN.	KD 30MIN.	KD 45MIN.	KD60MIN	DEAD 24HRS	ALIVE 24HRS	Average % Morality
PERMETHRIN-1	25	0	0	0	0	0	1	24	4
PERMETHRIN-2	25	0	0	0	0	0	2	23	8
PERMETHRIN-3	25	0	0	0	0	1	1	24	4
PERMETHRIN-4	25	0	0	0	0	0	2	23	8
CONTROL	20	0	0	0	0	0	0	20	0
								% mortality	6
								Std	2.3094

## Sheet: Pantami Gombe
Pantami Gombe				larval bioassay
				insecticides
				permethrin
		Temperature 44⁰C Survivors			Temperature survivor 45C
INSECTICIDE CONC (mg/ml)	1st REPLICATE		2nd REPLICATE		3rd REPLICATE		4th REPLICATE		AVERAGE %MORTALITY
	DEAD 24HRS	ALIVE 24HRS	DEAD 24HRS	ALIVE 24HRS	DEAD 24HRS	ALIVE 24HRS	DEAD 24HRS	ALIVE 24HRS		SD
100	7	13	11	9	15	5	8	12	51.25	3.59398
50	10	10	4	14	2	18	0	20	20	4.32049
25	1	19	0	20	4	14	1	19	7.5	1.73205
12.5	0	20	1	19	0	20	1	19	2.5	0.57735
CONTROL H2O	0	20							0
CONTROL ETHANOL	1	19							5
		CONTROL
INSECTICIDE CONC (mg/ml)	1st REPLICATE		2nd REPLICATE		3rd REPLICATE		4th REPLICATE		AVERAGE %MORTALITY
	DEAD 24HRS	ALIVE 24HRS	DEAD 24HRS	ALIVE 24HRS	DEAD 24HRS	ALIVE 24HRS	DEAD 24HRS	ALIVE 24HRS		SD
100	5	15	8	12	6	14	18	2	46.25	5.96518
50	6	14	12	6	1	19	2	18	26.25	4.99166
25	3	17	0	20	4	14	1	19	10	1.82574
12.5	1	19	3	17	2	18	4	16	12.5	1.29099
CONTROL H2O	0	20							0
CONTROL ETHANOL	0	20							0
			Adult Bioassay
	PERMETHRIN 0.75%		Temperature 44⁰C Survivors
INSECTICIDES	No. of Mosquitoes	DEAD 0MIN.	KD 15MIN.	KD 30MIN.	KD 45MIN.	KD60MIN	DEAD 24HRS	ALIVE 24HRS	Average % Morality
PERMETHRIN-1	25	0	1	1	3	3	4	21	16
PERMETHRIN-2	21	0	1	2	2	2	2	19	9.52381
PERMETHRIN-3	23	0	0	0	1	1	2	21	8.69565
PERMETHRIN-4	20	0	0	2	2	5	3	16	15
CONTROL	19	0	0	0	0	0	1	18	5.26316
								% mortality	12.3049
								Std	3.72731
				NOT TESTED FOR TT
	PERMETHRIN 0.75%		CONTROL
INSECTICIDES	No. of Mosquitoes	DEAD 0MIN.	KD 15MIN.	KD 30MIN.	KD 45MIN.	KD60MIN	DEAD 24HRS	ALIVE 24HRS	Average % Morality
PERMETHRIN-1	26	0	1	1	2	6	8	18	30.7692
PERMETHRIN-2	25	0	0	2	1	2	5	20	20
PERMETHRIN-3	25	0	1	1	4	4	4	21	16
PERMETHRIN-4	25	0	0	0	2	3	3	22	12
CONTROL	25	0	0	0	0	0	0	25	0
								% mortality	19.6923
								Std	8.0746
