# Supplementary material for: 2La Paracentric Chromosomal Inversion and Overexpressed Metabolic Genes Enhance Thermotolerance and Pyrethroid Resistance in the Major Malaria Vector Anopheles gambiae
Source: Preprints.org preprint supplement (doi:10.20944/preprints202103.0693.v1), 2021-03-29
Supplement: Supplementary file 4 [file File-S1-Results-Temperature-Gradient-and-LT50s.xlsx]

## Sheet: Auyo temperature gradient
AUYO						AUYO						AUYO						AUYO						AUYO						AUYO
TEMPERATURE 5⁰						TEMPERATURE 7⁰						TEMPERATURE 10⁰						TEMPERATURE 15⁰						TEMPERATURE 27⁰						TEMPERATURE 38⁰
Exposure Time	No. of mosq. Larvae	Dead 24hour	Alive 24hour			Exposure Time	No. of mosq. Larvae	Dead 24hour	Alive 24hour			Exposure Time	No. of mosq. Larvae	Dead 24hour	Alive 24hour			Exposure Time	No. of mosq. Larvae	Dead 24hour	Alive 24hour			Exposure Time	No. of mosq. Larvae	Dead 24hour	Alive 24hour			Exposure Time	No. of mosq. Larvae	Dead 24hour	Alive 24hour
				% mortality						% mortality						% mortality						% mortality						% mortality						% mortality
60MIN	25	0	25	0		60MIN	25	0	25	0		60MIN	25	0	25	0		60MIN	25	0	25	0		60MIN	25	0	25	0		60MIN	25	0	25	0
60MIN	25	0	25	0		60MIN	25	0	25	0		60MIN	25	0	25	0		60MIN	25	0	25	0		60MIN	25	0	25	0		60MIN	25	0	25	0
60MIN	25	0	25	0		60MIN	25	0	25	0		60MIN	25	0	25	0		60MIN	25	0	25	0		60MIN	25	0	25	0		60MIN	25	0	25	0
60MIN	25	0	25	0		60MIN	25	0	25	0		60MIN	25	0	25	0		60MIN	25	0	25	0		60MIN	25	0	25	0		60MIN	25	0	25	0
60MIN	25	0	25	0		60MIN	25	0	25	0		60MIN	25	0	25	0		60MIN	25	0	25	0		60MIN	25	0	25	0						0
60MIN	25	0	25	0		60MIN	25	0	25	0		60MIN	25	0	25	0		60MIN	25	0	25	0		60MIN	25	0	25	0						0
60MIN	25	0	25	0		60MIN	25	0	25	0		60MIN	25	0	25	0		60MIN	25	0	25	0		60MIN	25	0	25	0
60MIN	25	0	25	0		60MIN	25	0	25	0		60MIN	25	0	25	0		60MIN	25	0	25	0		60MIN	25	0	25	0
				0						0						0						0						0
				0						0						0						0						0
TEMPERATURE 42⁰						TEMPERATURE 43⁰						TEMPERATURE 44⁰						TEMPERATURE 45⁰						TEMPERATURE 46⁰
Exposure Time	No. of mosq. Larvae	Dead 24hour	Alive 24hour			Exposure Time	No. of mosq. Larvae	Dead 24hour	Alive 24hour			Exposure Time	No. of mosq. Larvae	Dead 24hour	Alive 24hour			Exposure Time	No. of mosq. Larvae	Dead 24hour	Alive 24hour			Exposure Time	No. of mosq. Larvae	Dead 24hour	Alive 24hour
				% mortality						% mortality						% mortality												% mortality
60MIN	25	1	24	4		60MIN	25	3	22	12		60MIN	25	17	8	68		60MIN	25	18	7	72		60MIN	25	24	1	96
60MIN	25	0	25	0		60MIN	25	0	25	0		60MIN	25	9	16	36		60MIN	25	25	0	100		60MIN	25	25	0	100
60MIN	25	0	25	0		60MIN	25	2	23	8		60MIN	25	5	20	20		60MIN	25	25	0	100		60MIN	25	25	0	100
60MIN	25	0	25	0		60MIN	25	4	21	16		60MIN	25	11	14	44		60MIN	25	22	3	88		60MIN	25	25	0	100
				1						9						42						90						99
				2.82843						2.82843						16.9706						11.3137						2.82843
Temperature ( oC)	alive	dead
0	200	0
5	200	0
7	200	0
10	200	0
15	200	0
27	200	0
38	100	0
42	99	1
43	99	9
44	58	42
45	10	90
46	1	99

## Sheet: BUK temperature gradient
BUK						BUK						BUK						BUK							TEMPERATURE 27⁰								TEMPERATURE 38⁰
TEMPERATURE 5⁰						TEMPERATURE 7⁰						TEMPERATURE 10⁰						TEMPERATURE 15⁰							Exposure Time	No. of mosq. Larvae	Dead 24hour	Alive 24hour					Exposure Time	No. of mosq. Larvae	Dead 24hour	Alive 24hour
Exposure Time	No. of mosq. Larvae	Dead 24hour	Alive 24hour			Exposure Time	No. of mosq. Larvae	Dead 24hour	Alive 24hour			Exposure Time	No. of mosq. Larvae	Dead 24hour	Alive 24hour			Exposure Time	No. of mosq. Larvae	Dead 24hour	Alive 24hour								% mortality								% mortality
				% mortality						% mortality						% mortality						% mortality			60MIN	25	0	25	0				60MIN	25	0	25	0
60MIN	25	0	25	0		60MIN	25	0	25	0		60MIN	25	0	25	0		60MIN	25	0	25	0			60MIN	25	0	25	0				60MIN	25	0	25	0
60MIN	25	0	25	0		60MIN	25	0	25	0		60MIN	25	0	25	0		60MIN	25	0	25	0			60MIN	25	0	25	0				60MIN	25	0	25	0
60MIN	25	0	25	0		60MIN	25	0	25	0		60MIN	25	0	25	0		60MIN	25	0	25	0			60MIN	25	0	25	0				60MIN	25	0	25	0
60MIN	25	0	25	0		60MIN	25	0	25	0		60MIN	25	0	25	0		60MIN	25	0	25	0			60MIN	25	0	25	0								0
60MIN	25	0	25	0		60MIN	25	0	25	0		60MIN	25	0	25	0		60MIN	25	0	25	0			60MIN	25	0	25	0								0
60MIN	25	0	25	0		60MIN	25	0	25	0		60MIN	25	0	25	0		60MIN	25	0	25	0			60MIN	25	0	25	0
60MIN	25	0	25	0		60MIN	25	0	25	0		60MIN	25	0	25	0		60MIN	25	0	25	0			60MIN	25	0	25	0
60MIN	25	0	25	0		60MIN	25	0	25	0		60MIN	25	0	25	0		60MIN	25	0	25	0							0
				0						0						0						0							0
				0						0						0						0
BUK						BUK						BUK						BUK						BUK
TEMPERATURE 42⁰						TEMPERATURE 43⁰						TEMPERATURE 44⁰						TEMPERATURE 45⁰						TEMPERATURE 46⁰
Exposure Time	No. of mosq. Larvae	Dead 24hour	Alive 24hour			Exposure Time	No. of mosq. Larvae	Dead 24hour	Alive 24hour			Exposure Time	No. of mosq. Larvae	Dead 24hour	Alive 24hour			Exposure Time	No. of mosq. Larvae	Dead 24hour	Alive 24hour			Exposure Time	No. of mosq. Larvae	Dead 24hour	Alive 24hour
				% mortality						% mortality						% mortality						% mortality						% mortality
60MIN	25	0	25	0		60MIN	25	1	24	4		60MIN	25	11	14	44		60MIN	25	22	3	88		60MIN	25	25	0	100
60MIN	25	0	25	0		60MIN	25	1	24	4		60MIN	25	9	17	36		60MIN	25	19	6	76		60MIN	25	25	0	100
60MIN	25	0	25	0		60MIN	25	0	25	0		60MIN	25	11	14	44		60MIN	25	25	0	100		60MIN	25	25	0	100
60MIN	25	0	25	0		60MIN	25	1	24	6		60MIN	25	7	18	28		60MIN	25	24	1	96		60MN	25	25	0	100
				0						3.5						38						90						100
				0						1.41421						11.3137						5.65685						0
Temperature ( oC)	alive	dead
0	200	0
5	200	0
7	200	0
10	200	0
15	200	0
27	200	0
38	100	0
42	100	0
43	97	3
44	63	37
45	10	90
46	0	100

## Sheet: Gamjin Bappa
Gamjin Bappa						GAMJIN BAPPA						GAMJIN BAPPA
TEMPERATURE 38⁰						TEMPERATURE 42⁰						TEMPERATURE 43⁰
Exposure Time	No. of mosq. Larvae	Dead 24hour	Alive 24hour			Exposure Time	No. of mosq. Larvae	Dead 24hour	Alive 24hour			Exposure Time	No. of mosq. Larvae	Dead 24hour	Alive 24hour
				% mortality						% mortality						% mortality
60MIN	25	0	25	0		60MIN	20	0	20	0		60MIN	20	0	20	0
60MIN	25	0	25	0		60MIN	20	0	20	0		60MIN	20	1	19	5
60MIN	25	0	25	0		60MIN	20	0	20	0		60MIN	20	0	20	0
60MIN	25	0	25	0		60MIN	20	0	20	0		60MIN	20	0	20	0
				0						0						1.25
				0						0						2.5
GAMJIN BAPPA						GAMJIN BAPPA						GAMJIN BAPPA
TEMPERATURE 44⁰						TEMPERATURE 45⁰						TEMPERATURE 46⁰
Exposure Time	No. of mosq. Larvae	Dead 24hour	Alive 24hour			Exposure Time	No. of mosq. Larvae	Dead 24hour	Alive 24hour			Exposure Time	No. of mosq. Larvae	Dead 24hour	Alive 24hour
				% mortality						% mortality						% mortality
60MIN	20	11	9	55		60MIN	20	20	0	100		60MIN	20	19	1	95
60MIN	20	6	14	30		60MIN	20	20	0	100		60MIN	20	18	2	90
60MIN	20	10	10	50		60MIN	20	17	3	85		60MIN	20	20	0	100
60MIN	20	11	9	55		60MIN	20	19	1	95		60MIN	20	20	0	100
				47.5						95						96.25
				11.9024						7.07107						4.78714
Temperature ( oC)	alive	dead
0	200	0
38	100	0
42	80	0
43	79	1
44	42	38
45	4	76
46	3	77

## Sheet: Pantami
Pantami						Pantami						Pantami
TEMPERATURE 38⁰						TEMPERATURE 42⁰							TEMPERATURE 43⁰
Exposure Time	No. of mosq. Larvae	Dead 24hour	Alive 24hour			Exposure Time	No. of mosq. Larvae	Dead 24hour	Alive 24hour				Exposure Time	No. of mosq. Larvae	Dead 24hour	Alive 24hour
				% mortality						% mortality							% mortality
60MIN	25	0	25	0		60MIN	25	0	25	0			60MIN	25	0	25	0
60MIN	25	0	25	0		60MIN	25	0	25	0			60MIN	25	0	25	0
60MIN	25	0	25	0		60MIN	25	0	25	0			60MIN	25	0	25	0
60MIN	25	0	25	0		60MIN	25	0	25	0			60MIN	25	0	25	0
				0						0							0
				0						0							0
GOMBE						GOMBE							GOMBE
TEMPERATURE 44⁰						TEMPERATURE 45⁰							TEMPERATURE 46⁰
Exposure Time	No. of mosq. Larvae	Dead 24hour	Alive 24hour	% mortality		Exposure Time	No. of mosq. Larvae	Dead 24hour	Alive 24hour	% mortality			Exposure Time	No. of mosq. Larvae	Dead 24hour	Alive 24hour	% mortality
60MIN	20	6	15	30		60MIN	20	11	9	55			60MIN	20	20	0	100
60MIN	20	6	14	30		60MIN	20	11	9	55			60MIN	20	20	0	100
60MIN	20	12	8	60		60MIN	20	16	4	80			60MIN	20	20	0	100
60MIN	20	10	10	50		60MIN	20	15	5	75			60MIN	20	20	0	100
				42.5						66.25							100
				14.1421						14.1421							0
Temperature ( oC)	alive	dead
0	200	0
38	100	0
42	100	0
43	100	0
44	47	33
45	27	53
46	0	80

## Sheet: Ngoussou
Ngoussou
TEMPERATURE 43⁰
Exposure Time	No. of mosq. Larvae	Dead 24hour	Alive 24hour	% mortality
60MIN	25	8	17	32
60MIN	25	9	16	36
60MIN	25	9	16	36
60MIN	25	11	14	44
				37
				8.48528
TEMPERATURE 44⁰
Exposure Time	No. of mosq. Larvae	Dead 24hour	Alive 24hour	% mortality
60MIN	25	25	0	100
60MIN	25	25	0	100
60MIN	25	25	0	100
60MIN	25	25	0	100
				100
				0
