# Supplementary material for: 2La Paracentric Chromosomal Inversion and Overexpressed Metabolic Genes Enhance Thermotolerance and Pyrethroid Resistance in the Major Malaria Vector Anopheles gambiae
Source: Preprints.org preprint supplement (doi:10.20944/preprints202103.0693.v1), 2021-03-29
Supplement: Supplementary file 6 [file File-S3-Results-Inversion Polymorphism-Genotyping-Rowdata.xlsx]

## Sheet: 44degrees-larvae-genoyping
S/No	Species	Larval stage of development	Site	Phenotype TT stress	Genotype
1	An. coluzzii	L4	BUK	ALIVE	2La/2L+a
2	An. coluzzii	L4	BUK	ALIVE	2L+a/+a
3	An. coluzzii	L4	BUK	ALIVE	2L+a/+a
4	An. coluzzii	L4	BUK	ALIVE	2La/2L+a
5	An. coluzzii	L4	BUK	ALIVE	2La/2L+a
6	An. coluzzii	L4	BUK	ALIVE	2La/a
7	An. coluzzii	L4	BUK	ALIVE	2L+a/+a
8	An. coluzzii	L4	BUK	ALIVE	2La/2L+a
9	An. coluzzii	L4	BUK	ALIVE	2La/2L+a
10	An. coluzzii	L4	BUK	ALIVE	2L+a/+a
11	An. coluzzii	L4	BUK	ALIVE	2L+a/+a
12	An. coluzzii	L4	BUK	ALIVE	2La/2L+a
13	An. coluzzii	L4	BUK	ALIVE	2La/2L+a
14	An. coluzzii	L4	BUK	DEAD	2L+a/+a
15	An. coluzzii	L4	BUK	DEAD	2L+a/+a
16	An. coluzzii	L4	BUK	DEAD	2La/2L+a
17	An. coluzzii	L4	BUK	DEAD	2L+a/+a
18	An. coluzzii	L4	BUK	DEAD	2L+a/+a
19	An. coluzzii	L4	BUK	DEAD	2La/2L+a
20	An. coluzzii	L4	BUK	DEAD	2L+a/+a
21	An. coluzzii	L4	BUK	DEAD	2La/a
22	An. coluzzii	L4	BUK	DEAD	2La/2L+a
23	An. coluzzii	L4	BUK	DEAD	2L+a/+a
24	An. coluzzii	L4	BUK	DEAD	2L+a/+a
25	An. gambiae	L4	BUK	DEAD	2L+a/+a
26	An. gambiae	L4	BUK	DEAD	2L+a/+a
27	An. coluzzii	L4	BUK	DEAD	2La/a
28	An. gambiae	L4	GAMJIN BAPPA	ALIVE	2L+a/+a
29	An. coluzzii	L4	GAMJIN BAPPA	ALIVE	2L+a/+a
30	An. gambiae	L4	GAMJIN BAPPA	ALIVE	2La/2L+a
31	An. gambiae	L4	GAMJIN BAPPA	ALIVE	2La/a
32	An. gambiae	L4	GAMJIN BAPPA	ALIVE	2L+a/+a
33	An. coluzzii	L4	GAMJIN BAPPA	ALIVE	2L+a/+a
34	An. coluzzii	L4	GAMJIN BAPPA	ALIVE	2La/2L+a
35	An. coluzzii	L4	GAMJIN BAPPA	ALIVE	2L+a/+a
36	An. coluzzii	L4	GAMJIN BAPPA	ALIVE	2La/2L+a
37	An. coluzzii	L4	GAMJIN BAPPA	ALIVE	2L+a/+a
38	An. gambiae	L4	GAMJIN BAPPA	ALIVE	2L+a/+a
39	An. gambiae	L4	GAMJIN BAPPA	ALIVE	2La/2L+a
40	An. gambiae	L4	GAMJIN BAPPA	DEAD	2La/a
41	An. coluzzii	L4	GAMJIN BAPPA	DEAD	2La/a
42	An. gambiae	L4	GAMJIN BAPPA	DEAD	2La/2L+a
43	An. gambiae	L4	GAMJIN BAPPA	DEAD	2La/2L+a
44	An. gambiae	L4	GAMJIN BAPPA	DEAD	2La/2L+a
45	An. coluzzii	L4	GAMJIN BAPPA	DEAD	2La/a
46	An. coluzzii	L4	GAMJIN BAPPA	DEAD	2La/2L+a
47	An. coluzzii	L4	PANTAMI	ALIVE	2La/2L+a
48	An. coluzzii	L4	PANTAMI	ALIVE	2L+a/+a
49	An. gambiae	L4	PANTAMI	ALIVE	2L+a/+a
50	An. coluzzii	L4	PANTAMI	ALIVE	2La/2L+a
51	An. coluzzii	L4	PANTAMI	ALIVE	2La/2L+a
52	An. coluzzii	L4	PANTAMI	ALIVE	2La/a
53	An. coluzzii	L4	PANTAMI	ALIVE	2L+a/+a
54	An. coluzzii	L4	PANTAMI	ALIVE	2La/2L+a
55	An. coluzzii	L4	PANTAMI	ALIVE	2La/2L+a
56	An. coluzzii	L4	PANTAMI	ALIVE	2L+a/+a
57	An. gambiae	L4	PANTAMI	ALIVE	2L+a/+a
58	An. coluzzii	L4	PANTAMI	ALIVE	2La/2L+a
59	An. coluzzii	L4	PANTAMI	ALIVE	2La/2L+a
60	An. gambiae	L4	PANTAMI	ALIVE	2La/a
61	An. coluzzii	L4	PANTAMI	ALIVE	2La/2L+a
62	An. gambiae	L4	PANTAMI	ALIVE	2La/2L+a
63	An. coluzzii	L4	PANTAMI	DEAD	2La/a
64	An. coluzzii	L4	PANTAMI	DEAD	2L+a/+a
65	An. gambiae	L4	PANTAMI	DEAD	2La/a
66	An. gambiae	L4	PANTAMI	DEAD	2L+a/+a
67	An. coluzzii	L4	PANTAMI	DEAD	2L+a/+a
68	An. gambiae	L4	PANTAMI	DEAD	2L+a/+a
69	An. gambiae	L4	PANTAMI	DEAD	2L+a/+a
70	An. coluzzii	L4	PANTAMI	DEAD	2La/2L+a
71	An. gambiae	L4	PANTAMI	DEAD	2La/a
72	An. gambiae	L4	PANTAMI	DEAD	2L+a/+a
73	An. coluzzii	L4	PANTAMI	DEAD	2La/2L+a
74	An. gambiae	L4	PANTAMI	DEAD	2L+a/+a
75	An. coluzzii	L4	PANTAMI	DEAD	2La/2L+a
76	An. gambiae	L4	PANTAMI	DEAD	2La/2L+a

## Sheet: larvae-permethrin-genotyping
Species	Site	Phenotype TT stress	Genotype	Remarks
An. gambiae	Auyo	Alive	2L+a/+a	homozygote +
An. gambiae	Auyo	Alive	2L+a/+a	homozygote +
An. coluzzii	Auyo	Alive	2La/+a	heterozygote
An. coluzzii	Auyo	Alive	2L+a/+a	homozygote +
An. coluzzii	Auyo	Alive	2La/+a	heterozygote
An. coluzzii	Auyo	Alive	2La/+a	heterozygote
An. coluzzii	Auyo	Alive	2L+a/+a	homozygote +
An. gambiae	Auyo	Alive	2La/a	homozygote -
An. coluzzii	Auyo	Alive	2La/+a	heterozygote
An. coluzzii	Auyo	Alive	2L+a/+a	homozygote +
An. coluzzii	Auyo	Alive	2La/a	homozygote -
An. coluzzii	Auyo	Dead	2La/2+a	heterozygote
An. coluzzii	Auyo	Dead	2L+a/+a	homozygote +
An. coluzzii	Auyo	Dead	2La/+a	heterozygote
An. coluzzii	Auyo	Dead	2L+a/+a	homozygote +
An. coluzzii	Auyo	Dead	2L+a/+a	homozygote +
An. coluzzii	Auyo	Dead	2La/+a	heterozygote
An. coluzzii	BUK	Alive	2La/a	homozygote -
An. coluzzii	BUK	Alive	2La/+a	heterozygote
An. coluzzii	BUK	Alive	2La/+a	heterozygote
An. coluzzii	BUK	Alive	2La/a	homozygote -
An. gambiae	BUK	Alive	2L+a/+a	homozygote +
An. coluzzii	BUK	Alive	2La/a	homozygote -
An. coluzzii	BUK	Alive	2L+a/+a	homozygote +
An. gambiae	BUK	Alive	2L+a/+a	homozygote +
An. coluzzii	BUK	Alive	2L+a/+a	homozygote +
An. coluzzii	BUK	Dead	2L+a/+a	homozygote +
An. coluzzii	BUK	Dead	2L+a/+a	homozygote +
An. coluzzii	BUK	Dead	2La/a	homozygote -
An. coluzzii	BUK	Dead	2L+a/+a	homozygote +
An. coluzzii	BUK	Dead	2La/+a	heterozygote
An. coluzzii	BUK	Dead	2L+a/+a	homozygote +
An. coluzzii	BUK	Dead	2La/+a	heterozygote
An. coluzzii	BUK	Dead	2La/+a	heterozygote
An. coluzzii	BUK	Dead	2L+a/+a	homozygote +
An. coluzzii	BUK	Dead	2L+a/+a	homozygote +						coluzzii	gambiae
An. coluzzii	BUK	Dead	2La/+a	heterozygote
									Auyo	14	3
An. gambiae	Gamjin Baffa	alive	2L+a/+a	homozygote +					buk	18	2
An. gambiae	Gamjin Baffa	alive	2L+a/+a	homozygote +					gamjin bappa	10	7
An. coluzzii	Gamjin Baffa	alive	2La/+a	heterozygote					pantami	16	14
An. gambiae	Gamjin Baffa	alive	2L+a/+a	homozygote +
An. coluzzii	Gamjin Baffa	alive	2La/a	homozygote -
An. coluzzii	Gamjin Baffa	alive	2La/+a	heterozygote
An. gambiae	Gamjin Baffa	Dead	2L+a/+a	homozygote +
An. gambiae	Gamjin Baffa	Dead	2L+a/+a	homozygote +
An. coluzzii	Gamjin Baffa	Dead	2L+a/+a	homozygote +
An. gambiae	Gamjin Baffa	Dead	2La/+a	heterozygote
An. coluzzii	Gamjin Baffa	Dead	2La/a	homozygote -
An. coluzzii	Gamjin Baffa	Dead	2L+a/+a	homozygote +
An. gambiae	Gamjin Baffa	Dead	2La/+a	heterozygote
An. coluzzii	Gamjin Baffa	Dead	2La/+a	heterozygote
An. coluzzii	Gamjin Baffa	Dead	2La/+a	heterozygote
An. coluzzii	Gamjin Baffa	Dead	2L+a/+a	homozygote +
An. coluzzii	Gamjin Baffa	Dead	2La/+a	heterozygote
An. gambiae	Pantami	Alive	2La/a	homozygote -
An. coluzzii	Pantami	Alive	2La/+a	heterozygote
An. gambiae	Pantami	Alive	2L+a/+a	homozygote +
An. coluzzii	Pantami	Alive	2L+a/+a	homozygote +
An. coluzzii	Pantami	Alive	2L+a/+a	homozygote +
An. gambiae	Pantami	Alive	2L+a/+a	homozygote +
An. coluzzii	Pantami	Alive	2La/a	homozygote -
An. coluzzii	Pantami	Alive	2L+a/+a	homozygote +
An. coluzzii	Pantami	Alive	2La/a	homozygote -
An. coluzzii	Pantami	Alive	2La/+a	heterozygote
An. coluzzii	Pantami	Alive	2La/+a	heterozygote
An. gambiae	Pantami	Alive	2La/a	homozygote -
An. gambiae	Pantami	Alive	2La/+a	heterozygote
An. coluzzii	Pantami	Alive	2La/+a	heterozygote
An. gambiae	Pantami	Alive	2L+a/+a	homozygote +
An. coluzzii	Pantami	Dead	2L+a/+a	homozygote +
An. gambiae	Pantami	Dead	2La/+a	heterozygote
An. gambiae	Pantami	Dead	2La/+a	heterozygote
An. gambiae	Pantami	Dead	2L+a/+a	homozygote +
An. coluzzii	Pantami	Dead	2La/a	homozygote -
An. coluzzii	Pantami	Dead	2La/+a	heterozygote
An. coluzzii	Pantami	Dead	2La/+a	heterozygote
An. coluzzii	Pantami	Dead	2L+a/+a	homozygote +
An. coluzzii	Pantami	Dead	2L+a/+a	homozygote +
An. gambiae	Pantami	Dead	2La/+a	heterozygote
An. gambiae	Pantami	Dead	2L+a/+a	homozygote +
An. gambiae	Pantami	Dead	2La/a	homozygote -
An. coluzzii	Pantami	Dead	2La/a	homozygote -
An. gambiae	Pantami	Dead	2La/+a	heterozygote
An. gambiae	Pantami	Dead	2La/+a	heterozygote

## Sheet: adult-permethrin genotyping
Species	Site	Phenotype	Genotype
An. gambiae	Auyo	Alive	2La/2L+a
An. coluzzii	Auyo	Alive	2La/2L+a
An. coluzzii	Auyo	Alive	2L+a/+a
An. coluzzii	Auyo	Alive	2L+a/+a
An. coluzzii	Auyo	Alive	2La/2L+a
An. gambiae	Auyo	Alive	2La/2L+a
An. coluzzii	Auyo	Alive	2L+a/+a
An. coluzzii	Auyo	Alive	2La/a
An. coluzzii	Auyo	Alive	2L+a/+a
An. coluzzii	Auyo	Alive	2La/a
An. coluzzii	Auyo	Alive	2La/2L+a
An. coluzzii	Auyo	Alive	2La/2L+a
An. coluzzii	Auyo	Alive	2La/a
An. coluzzii	Auyo	Alive	2La/2L+a
An. coluzzii	Auyo	Alive	2La/2L+a
An. coluzzii	Auyo	Alive	2La/2L+a
An. coluzzii	Auyo	Dead	2La/2L+a
An. coluzzii	Auyo	Dead	2L+a/+a
An. coluzzii	Auyo	Dead	2La/2L+a
An. coluzzii	Auyo	Dead	2La/2L+a
An. coluzzii	Auyo	Dead	2L+a/+a
An. coluzzii	Auyo	Dead	2L+a/+a
An. coluzzii	Auyo	Dead	2La/a
An. coluzzii	Auyo	Dead	2La/2L+a
An. coluzzii	Auyo	Dead	2La/2L+a
An. coluzzii	Auyo	Dead	2L+a/+a
An. coluzzii	Auyo	Dead	2L+a/+a
An. gambiae	Auyo	Dead	2L+a/+a
An. coluzzii	BUK	alive	2La/2L+a
An. coluzzii	BUK	alive	2La/2L+a
An. coluzzii	BUK	alive	2L+a/+a
An. coluzzii	BUK	alive	2La/2L+a
An. coluzzii	BUK	alive	2L+a/+a
An. coluzzii	BUK	alive	2La/a
An. coluzzii	BUK	alive	2La/2L+a
An. coluzzii	BUK	alive	2L+a/+a
An. coluzzii	BUK	alive	2L+a/+a
An. coluzzii	BUK	alive	2La/a
An. coluzzii	BUK	alive	2La/2L+a
An. coluzzii	BUK	alive	2La/2L+a
An. coluzzii	BUK	alive	2L+a/+a
An. coluzzii	BUK	alive	2La/2L+a
An. coluzzii	BUK	alive	2La/2L+a
An. coluzzii	BUK	alive	2L+a/+a
An. coluzzii	BUK	alive	2La/2L+a
An. coluzzii	BUK	alive	2L+a/+a
An. coluzzii	BUK	alive	2L+a/+a
An. coluzzii	BUK	alive	2La/a
An. coluzzii	BUK	alive	2L+a/+a
An. coluzzii	BUK	alive	2La/a
An. coluzzii	BUK	Dead	2L+a/+a
An. coluzzii	BUK	Dead	2L+a/+a
An. coluzzii	BUK	Dead	2L+a/+a
An. gambiae	BUK	Dead	2L+a/+a
An. coluzzii	BUK	Dead	2L+a/+a
An. coluzzii	BUK	Dead	2L+a/+a
An. coluzzii	BUK	Dead	2L+a/+a
An. coluzzii	BUK	Dead	2L+a/+a
An. coluzzii	BUK	Dead	2La/2L+a
An. coluzzii	BUK	Dead	2La/2L+a
An. coluzzii	Gamjin Baffa	alive	2L+a/+a
An. coluzzii	Gamjin Baffa	alive	2L+a/+a
An. gambiae	Gamjin Baffa	alive	2L+a/+a
An. coluzzii	Gamjin Baffa	alive	2L+a/+a
An. coluzzii	Gamjin Baffa	alive	2La/a
An. coluzzii	Gamjin Baffa	alive	2La/2L+a
An. gambiae	Gamjin Baffa	alive	2La/a
An. gambiae	Gamjin Baffa	alive	2La/2L+a
An. coluzzii	Gamjin Baffa	alive	2La/a
An. coluzzii	Gamjin Baffa	alive	2La/a
An. coluzzii	Gamjin Baffa	alive	2La/2L+a
An. coluzzii	Gamjin Baffa	alive	2L+a/+a
An. coluzzii	Gamjin Baffa	alive	2L+a/+a
An. gambiae	Gamjin Baffa	alive	2L+a/+a
An. gambiae	Gamjin Baffa	alive	2La/2L+a
An. coluzzii	Gamjin Baffa	alive	2La/a
An. coluzzii	Gamjin Baffa	alive	2L+a/+a
An. coluzzii	Gamjin Baffa	alive	2La/2L+a
An. gambiae	Gamjin Baffa	alive	2L+a/+a
An. gambiae	Gamjin Baffa	Dead	2L+a/+a
An. gambiae	Gamjin Baffa	Dead	2La/2L+a
An. gambiae	Gamjin Baffa	Dead	2L+a/+a
An. coluzzii	Gamjin Baffa	Dead	2L+a/+a
An. coluzzii	Gamjin Baffa	Dead	2La/2L+a
An. coluzzii	Gamjin Baffa	Dead	2La/2L+a
An. coluzzii	Gamjin Baffa	Dead	2L+a/+a
An. gambiae	Gamjin Baffa	Dead	2La/2L+a
An. gambiae	Gamjin Baffa	Dead	2L+a/+a
An. gambiae	Pantami	alive	2La/a
An. gambiae	Pantami	alive	2L+a/+a
An. gambiae	Pantami	alive	2L+a/+a
An. gambiae	Pantami	alive	2La/a
An. gambiae	Pantami	alive	2La/a
An. gambiae	Pantami	alive	2La/a
An. coluzzii	Pantami	alive	2La/a
An. gambiae	Pantami	alive	2La/a
An. gambiae	Pantami	alive	2La/2L+a
An. coluzzii	Pantami	alive	2La/2L+a
An. coluzzii	Pantami	alive	2La/a					coluzzii	gambiae
An. coluzzii	Pantami	alive	2La/a				Auyo	25	3
An. coluzzii	Pantami	alive	2L+a/+a				BUK	31	1
An. gambiae	Pantami	alive	2La/a				Gbappa	17	11
An. gambiae	Pantami	alive	2La/2L+a				Pantami	10	16
An. coluzzii	Pantami	alive	2La/2L+a
An. coluzzii	Pantami	Dead	2La/2L+a
An. gambiae	Pantami	Dead	2La/a
An. coluzzii	Pantami	Dead	2La/a
An. coluzzii	Pantami	Dead	2L+a/+a
An. gambiae	Pantami	Dead	2La/2L+a
An. coluzzii	Pantami	Dead	2La/2L+a
An. gambiae	Pantami	Dead	2La/2L+a
An. gambiae	Pantami	Dead	2L+a/+a
An. gambiae	Pantami	Dead	2La/a
An. gambiae	Pantami	Dead	2L+a/+a
